# Supplementary material for: Recurrence and Survival Following Cytoreductive Surgery and Hyperthermic Intraperitoneal Chemotherapy for Synchronous and Metachronous Peritoneal Metastases of Colorectal Origin
Source: MDPI journal article supplement (doi:10.3390/cancers16030631), 2024-02-01
Supplement: s1 [file s1]

TABLE S1. Disease-free survival for patients with synchronous and metachronous peritoneal metastases.

| <b>Time<br/>(months)</b> | <b>Synchronous PM<br/>n=181</b> | <b>Metachronous PM<br/>n=129</b> | <b>P-value</b> | <b>Total<br/>n=310</b> |
|--------------------------|---------------------------------|----------------------------------|----------------|------------------------|
| 0-6                      | 81.0 (74.2; 86.2)               | 72.5 (63.6; 79.6)                | 0.9            | 77.5 (72.2; 81.9)      |
| 6-12                     | 52.3 (44.4; 59.6)               | 42.2 (33.1; 50.9)                | 0.01           | 48.1 (42.1; 53.8)      |
| 12-18                    | 31.7 (24.6; 39.0)               | 23.3 (16.0; 31.4)                | 0.8            | 28.2 (23.0; 33.6)      |
| 18-24                    | 23.3 (17.0; 30.1)               | 11.8 (6.6; 18.7)                 | 0.02           | 18.6 (14.2; 23.5)      |

TABLE S2. Overall survival for patients with synchronous and metachronous peritoneal metastases.

| <b>Time (year)</b> | <b>Synchronous PM<br/>n= 187</b> | <b>Metachronous PM<br/>n=130</b> | <b>P-value</b> | <b>Total<br/>n=317</b> |
|--------------------|----------------------------------|----------------------------------|----------------|------------------------|
| <b>1</b>           | 90.4 (84.7; 93.6)                | 90.7 (84.2; 94.6)                | 0.9            | 90.3 (86.4; 93.1)      |
| <b>3</b>           | 49.3 (41.6; 56.6)                | 53.4 (44.1; 61.9)                | 0.8            | 51.0 (45.1; 56.6)      |
| <b>5</b>           | 33.2 (25.5; 41.0)                | 33.7 (24.5; 43.2)                | 0.5            | 33.3 (27.4; 39.4)      |
